# Supplementary material for: NRF1 coordinates mitochondrial adaptations to dampen intracellular ROS and inflammatory responses during ischemia reperfusion
Source: Springer Nature journal article supplement (doi:10.1038/s41420-025-02461-5), 2025-05-15
Supplement: MOESM1 [file 41420_2025_2461_MOESM1_ESM.pdf]

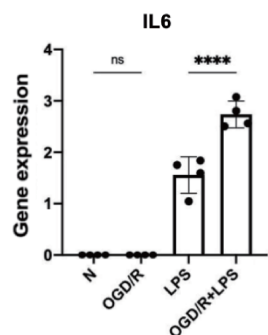

Supplementary Fig 1.

Il6 gene expression as assessed by qRT-PCR in BMDMs stimulated with OGD/R and LPS (20 ng/mL) as indicated. N, non-treated.

Statistical test by one-way ANOVA (n=4 and representative of 4 independent experiments, n.s. no significance, \*P<0.05, \*\*P<0.01, \*\*\*P<0.001, \*\*\*\*P<0.0001).

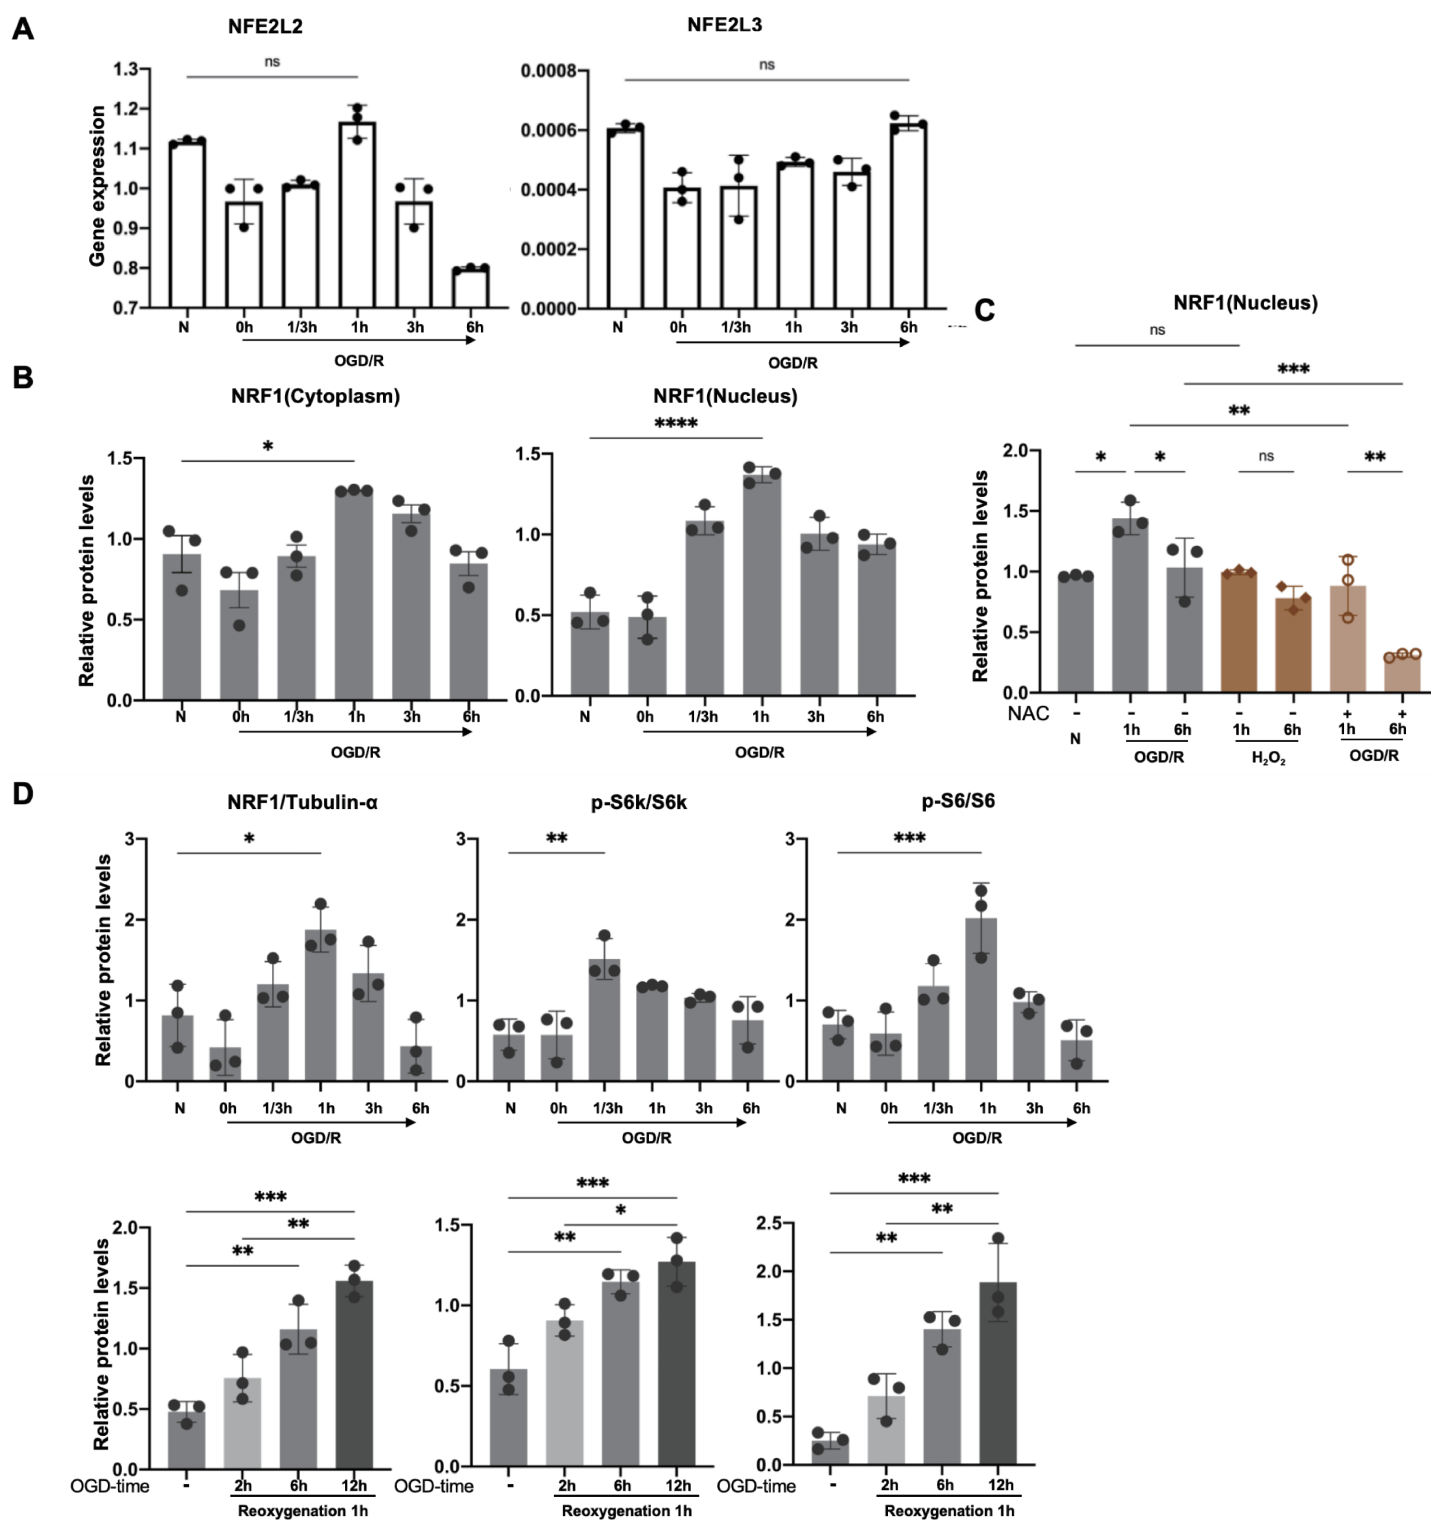

F

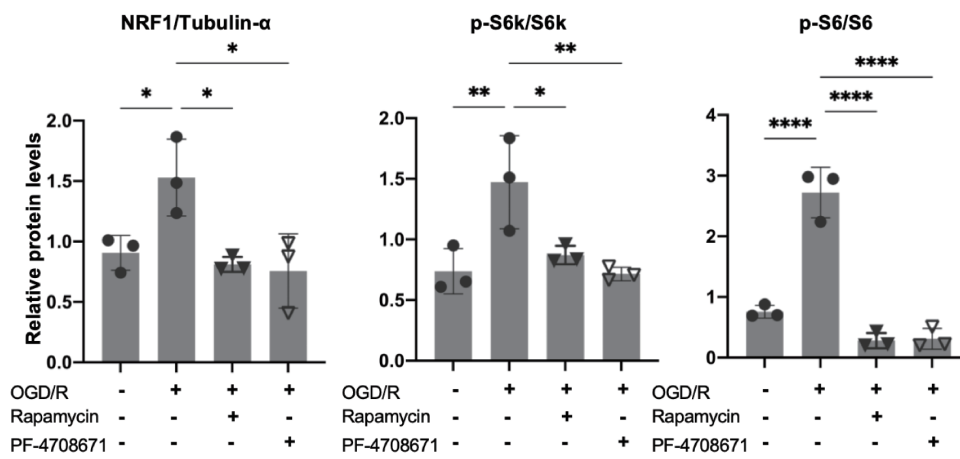

Supplementary Fig 2.

A. Gene expression of NFE2L2 (NRF2) and NFE2L3 (NRF3) in BMDMs subject to OGD/R.

B. BMDMs were treated with OGD followed by different durations of reoxygenation. NRF1 proteins levels in cytosolic and nuclear fractions was analyzed by WB, and quantitation of NRF1 was normalized to α-Tubulin in cytoplasm and LAMIN A/C in nucleus.

C. BMDMs were treated with OGD followed by different durations of reoxygenation +/- H<sub>2</sub>O<sub>2</sub> treatment during reoxygenation. Quantitation of NRF1 proteins levels in nucleus is shown versus LAMIN A/C.

D. BMDMs were treated with OGD followed by different durations of reoxygenation. NRF1 protein levels and mTORC1 signaling were assessed by WB. Quantitative data are presented as relative protein levels of bands intensities including NRF1/α-Tubulin, pS6K/S6K, pS6/S6 for the corresponding OGD/R stimulation time point.

E. BMDMs were subject to different durations of OGD followed by 1h reoxygenation. NRF1 levels and mTORC1 signaling were assessed by WB. Quantitative data are presented as relative protein levels of bands intensities respectively including NRF1/α-Tubulin, pS6K/S6K, pS6/S6.

F. BMDMs were subject to OGD/R +/- mTOR inhibitor (rapamycin, 400 nM) or S6K inhibitor (PF-4708671, 10 μM) during reoxygenation as indicated. NRF1 levels and mTORC1 signaling were assessed by WB(J). Quantitative data are presented as relative protein levels of bands intensities respectively including NRF1/α-Tubulin, pS6K/S6K, pS6/S6.

Statistical test by one-way ANOVA (n=3 and representative of 3 independent experiments, n.s. no significance).

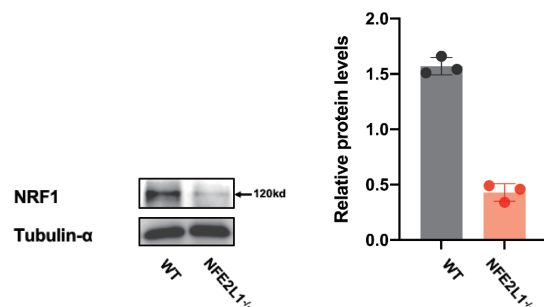

Supplementary Fig 3.

Whole cell lysates from WT and NFE2L1<sup>-/-</sup> BMDMs were assessed for levels of NRF1 by WB with quantitation, which was normalized to Tubulin-α.

Statistical test by one-way ANOVA (n=3 and representative of 3 independent experiments, n.s. no significance).

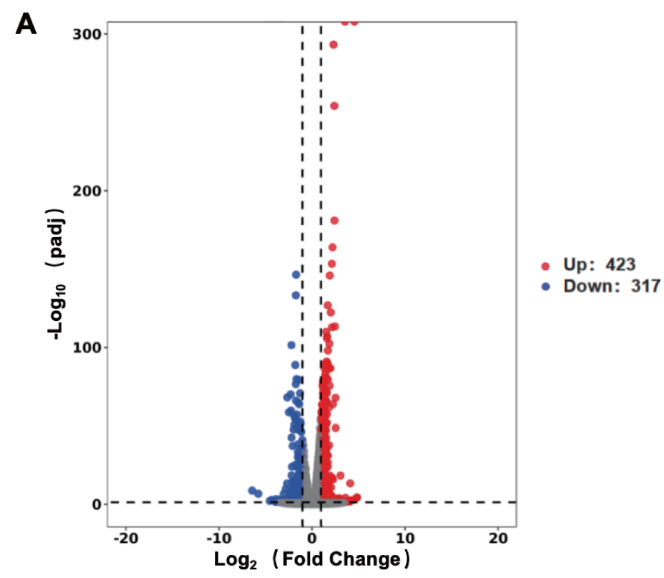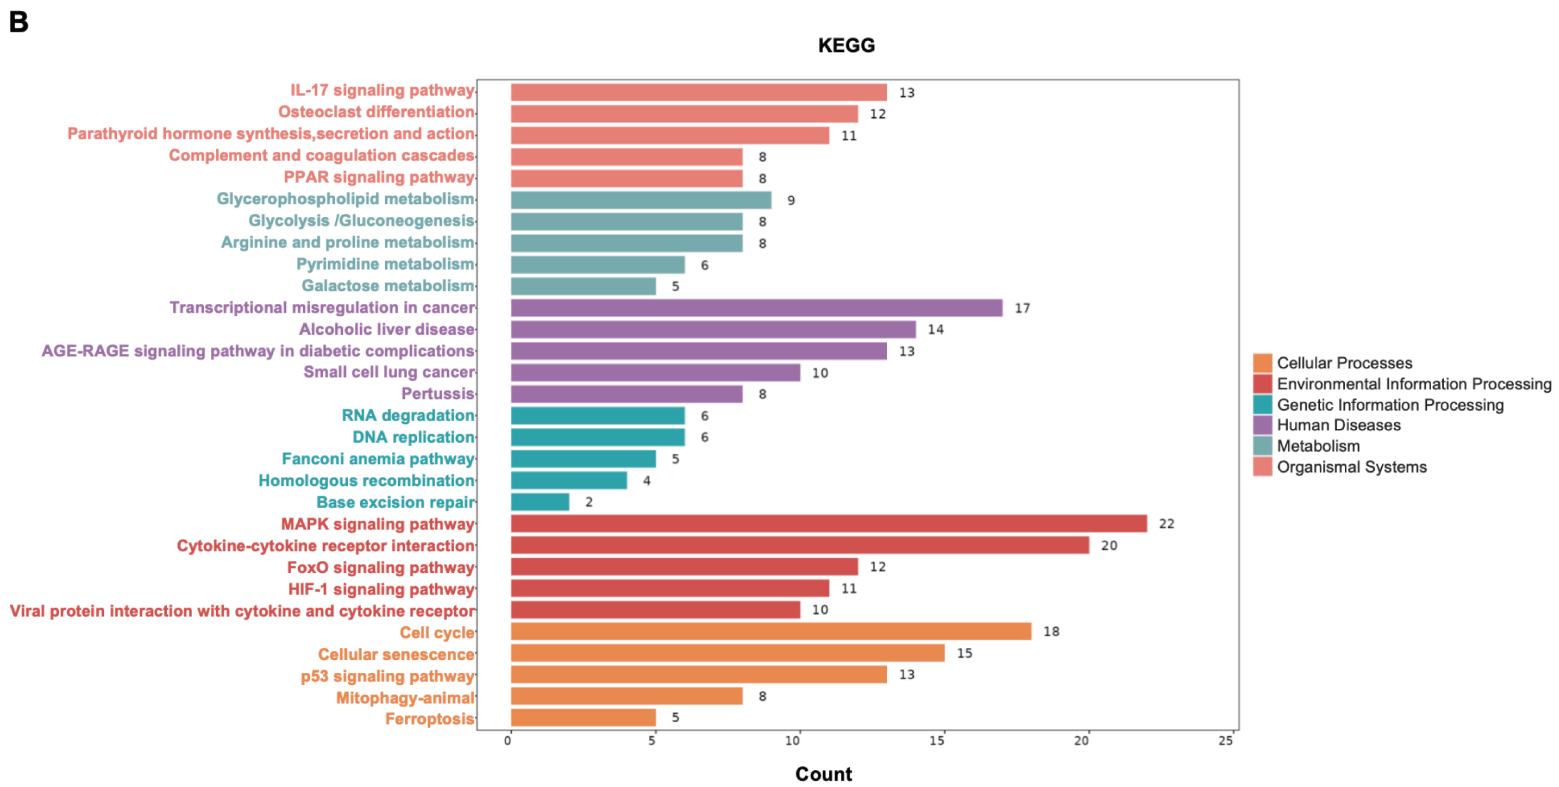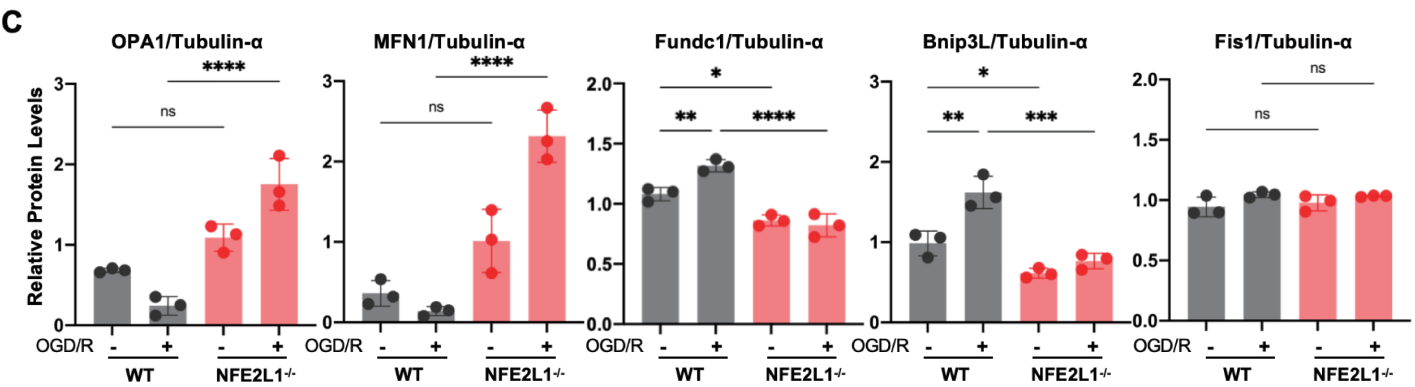

D

FUND1

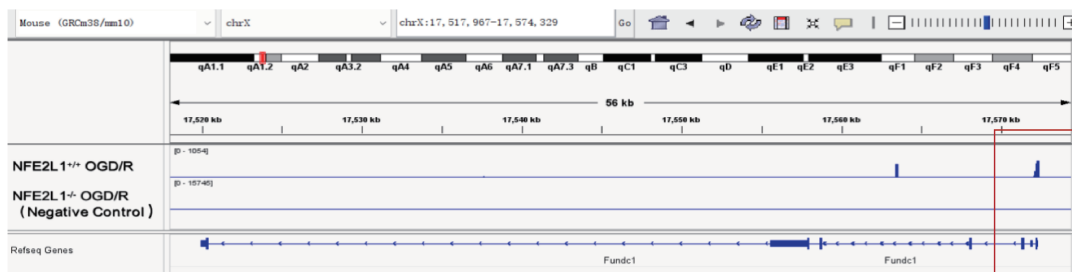

BNIP3L

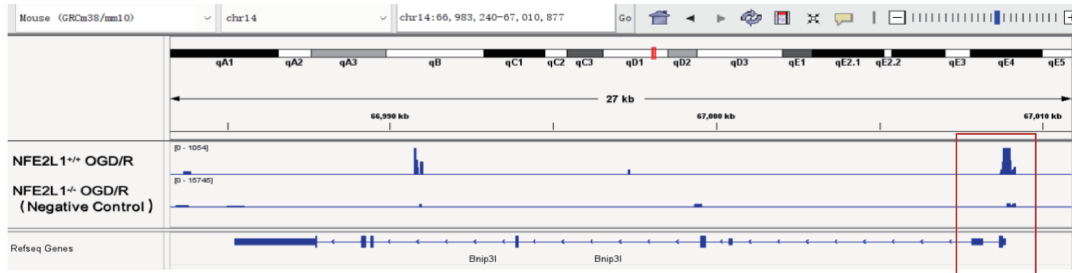

E

NFE2L1(NRF1) Cut&Tag GO analysis (TOP20)

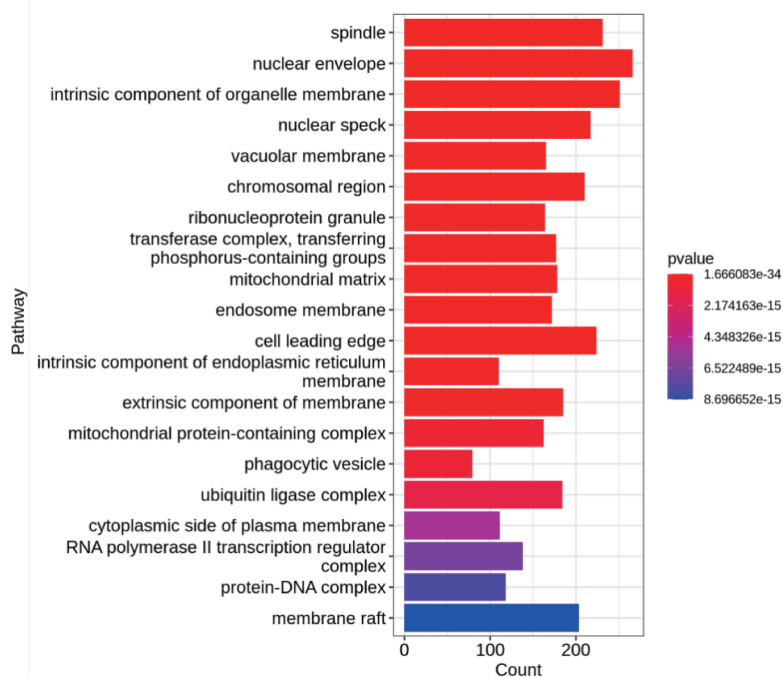

NFE2L1(NRF1) Cut&Tag KEGG analysis (TOP20)

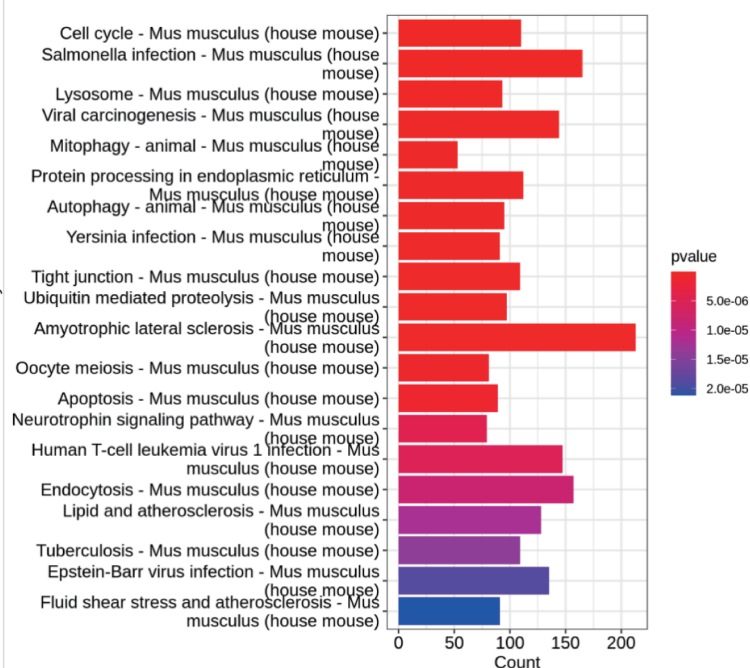

Supplementary Fig 4.

A-B. BMDMs were subject to OGD/R or not followed by RNA-seq analysis.

A. Genes up- and down- regulated by OGD/R stimulation relative to unstimulated.

B. KEGG analysis of gene upregulated by OGD/R stimulation relative to unstimulated.

C.WT and NFE2L1<sup>-/-</sup> BMDMs were subject to OGD/R followed by analysis of the indicated mitophagy regulators by WB with quantitation, which was normalized to Tubulin- $\alpha$ .

D-E. WT and NFE2L1<sup>-/-</sup> BMDMs were subject to OGD/R followed by NRF1 Cut and Tag-seq analysis.

D. Representative NRF1 tracks at the Fundc1 and Bnip3L genes displayed using IGV software.

E. GO and KEGG analysis to find enriched pathways in genes bound by NRF1 (i.e. upregulated in WT versus NFE2L1<sup>-/-</sup> BMDMs).

Statistical test by one-way ANOVA (n=3 and representative of 3 independent experiments, n.s. no significance).



| Primers               | 5' to 3'                 |
|-----------------------|--------------------------|
| NFE2L1 forward        | ACTGCAAGATGGACGAGAACGA   |
| NFE2L1 reverse        | GAAACGTCAGCTGGGAACGTG    |
| IL6 forward           | ACAAAGCCAGAGTCCTTCAGAGAG |
| IL6 reverse           | TTGGATGGTCTTGGTCCTTAGCCA |
| Psm5 forward          | AATTGGCTCTGCTTCTGAGGGT   |
| Psm5 reverse          | GAAATTCTGACCAGGCTGCACC   |
| Psm6 forward          | AGGCCACTCGGTTGTTGTATGA   |
| Psm6 reverse          | AGCCACAGTAGTAACCTGCAGG   |
| Psmb2 forward         | ATGTGTTGGAGAGGCTGGAGAC   |
| Psmb2 reverse         | GATATGGGGTCCGACTCCGAAG   |
| Psmb8 forward         | TGGGGTGATGGACAGTGGTTAC   |
| Psmb8 reverse         | GCCTCTCCGTACTTGTACAGCA   |
| Psmb9 forward         | TATGGAACCATGGGAGGGATGC   |
| Psmb9 reverse         | GTGACCAGGTAGATGACACCCC   |
| Psmb10 forward        | TGTGGATGCCTGTGTGATCACT   |
| Psmb10 reverse        | GTGTGGTTCCAGGAGCAAATCG   |
| Psmc1 forward         | CTGCCGGATGAGAAGACCAAGA   |
| Psmc1 reverse         | CCAGAGAGGTATCCTTTGCCA    |
| Psmc5 forward         | CACTGGGAAGACATTGTTGGCC   |
| Psmc5 reverse         | GTTCTCGGGCCATGACAAACAG   |
| Psmd10 forward        | GGTGCACATGTGAATGCTGTCA   |
| Psmd10 reverse        | TGGTCCTTCGCATCTGGGTTAG   |
| Psme1 forward         | GGTCACTACCTGGTTGCAGCTA   |
| Psme1 reverse         | ACTTGAGATCTGCGTGTGGAA    |
| Psme2 forward         | GAGGCTGATGACTTCCTCTGCA   |
| Psme2 reverse         | GGAATCCTCCTGCAAGAGCTGA   |
| Fundc1 forward        | GTCGTGTACAGGGAAGAGTGG    |
| Fundc1 reverse        | TCTAGGCCGAGTTGGAAGTCT    |
| Bnip3L forward        | CTCAGCCCCTCCGGCTATTG     |
| Bnip3L reverse        | GTGCGGAAGTCGAGCTGATA     |
| Actin $\beta$ forward | CGGTTCCGATGCCCTGAGGCTCTT |
| Actin $\beta$ reverse | CGTCACACTTCATGATGGAATTGA |
| NFE2L2 forward        | CTTTAGTCAGCGACAGAAGGAC   |
| NFE2L2 reverse        | AGGCATCTTGTTTGGGAATGTG   |
| NFE2L3 forward        | TGAGCCAAGCTATAAGCCATGA   |
| NFE2L3 reverse        | AATGGTTCTTGTGCCTGTGAA    |

Supplementary table 1.  
Primer sequences

**Fig2B**

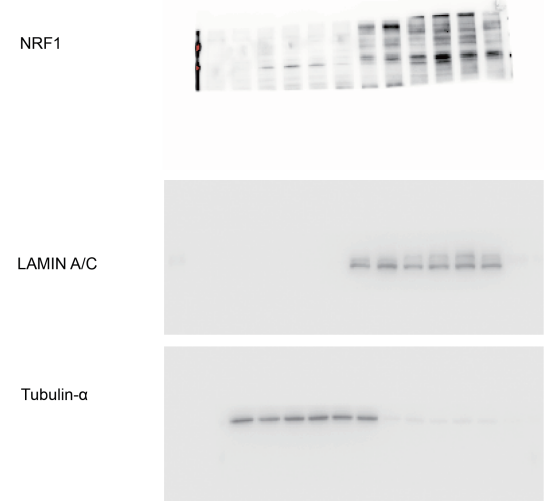

**Fig2C**

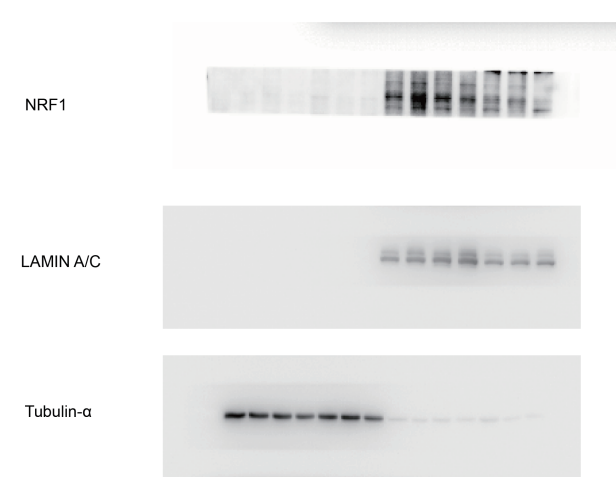

**Fig3A**

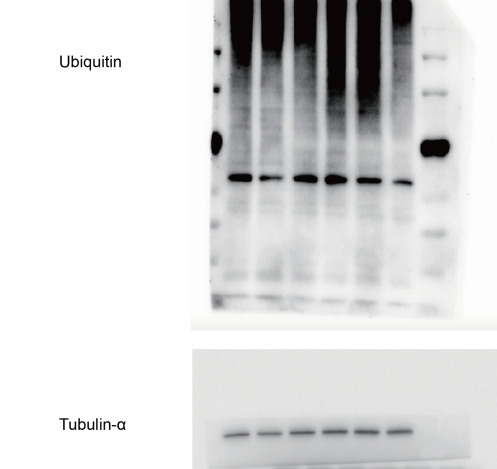

**Fig3D**

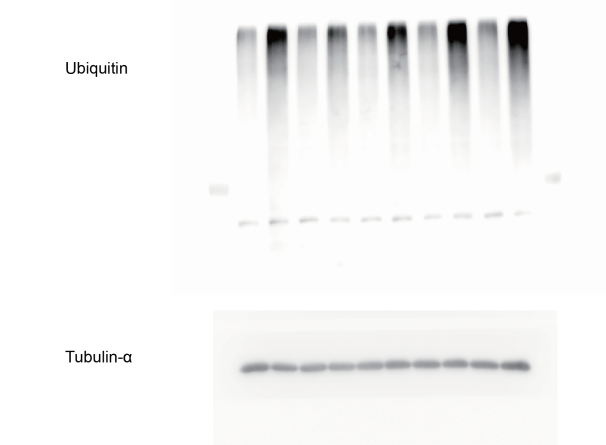

**Fig2D**

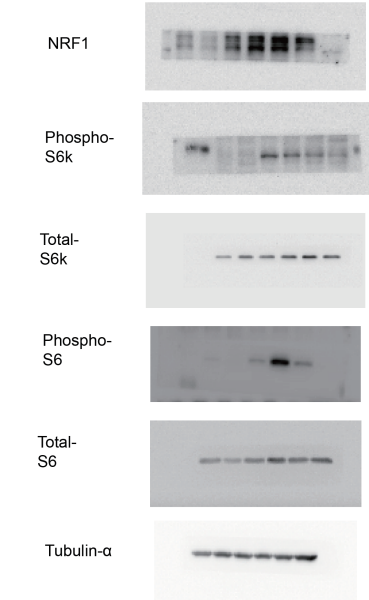

**Fig2F**

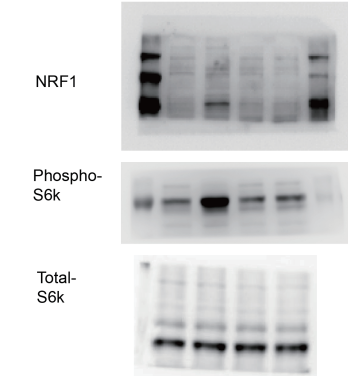

**Fig5B**

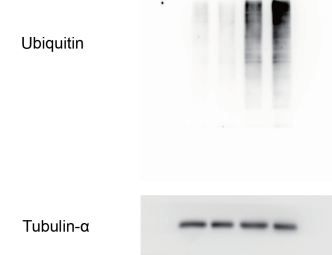

**Fig5D**

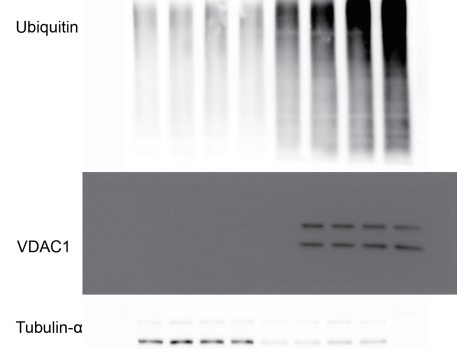

**Fig5F**

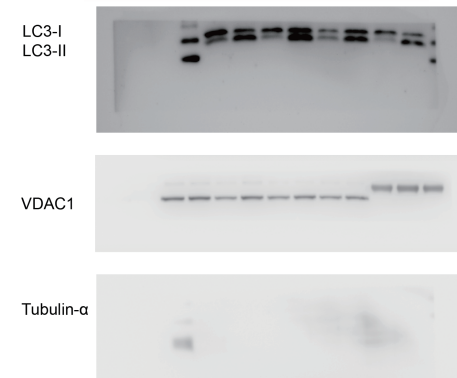

**Fig2E**

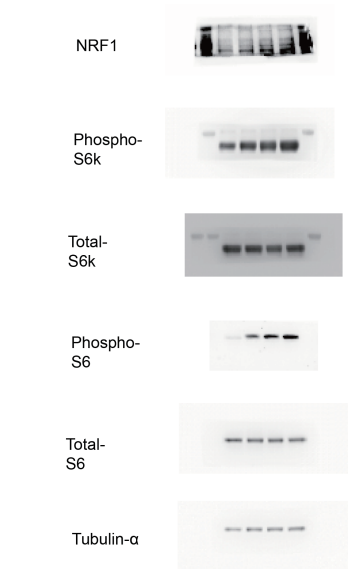

**Fig2F**

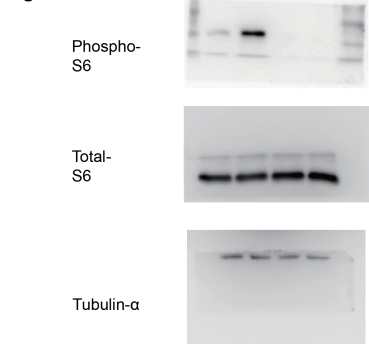

**Fig5J**

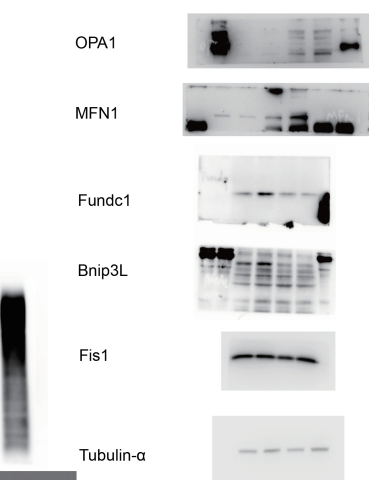

Supplementary Fig3

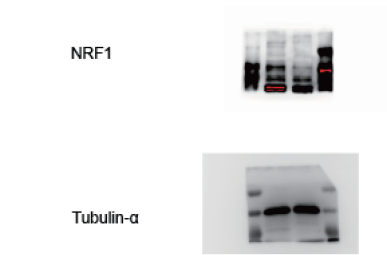

Supplementary Figure full blot.
